# Supplementary material for: A simple sensor based on 1,8-naphthalimide with large Stokes shift for detection of hypochlorous acid in living cells
Source: Royal Society of Chemistry journal article supplement (doi:10.1039/c9ra06174f), 2019-01-01
Supplement: c9ra06174f1.pdf [file c9ra06174f1.pdf]

## **A simple sensor based on 1,8-naphthalimide with large Stokes shift for detection of hypochlorous acid in living cells**

1.  $^1\text{H}$  NMR spectrum of compound 2
  2.  $^{13}\text{C}$  NMR spectrum of compound 2
  3.  $^1\text{H}$  NMR spectrum of Probe 1
  4.  $^{13}\text{C}$  NMR spectrum of Probe 1
  5. HRMS spectra characterizations of Probe 1
  6. Fluorescence spectra of Probe 1 to various relevant species
  7. Comparison of the fluorescence intensity with various reducing materials
  8. Mass spectrum of Probe 1 after oxidation by HOCl
  9. FT-IR Spectra of Probe 1 and product after reaction with HOCl
  10. MTT assay of HeLa cells treated in the presence of Probe 1
- Table S1 Comparison of highly specific fluorescent probes for HOCl

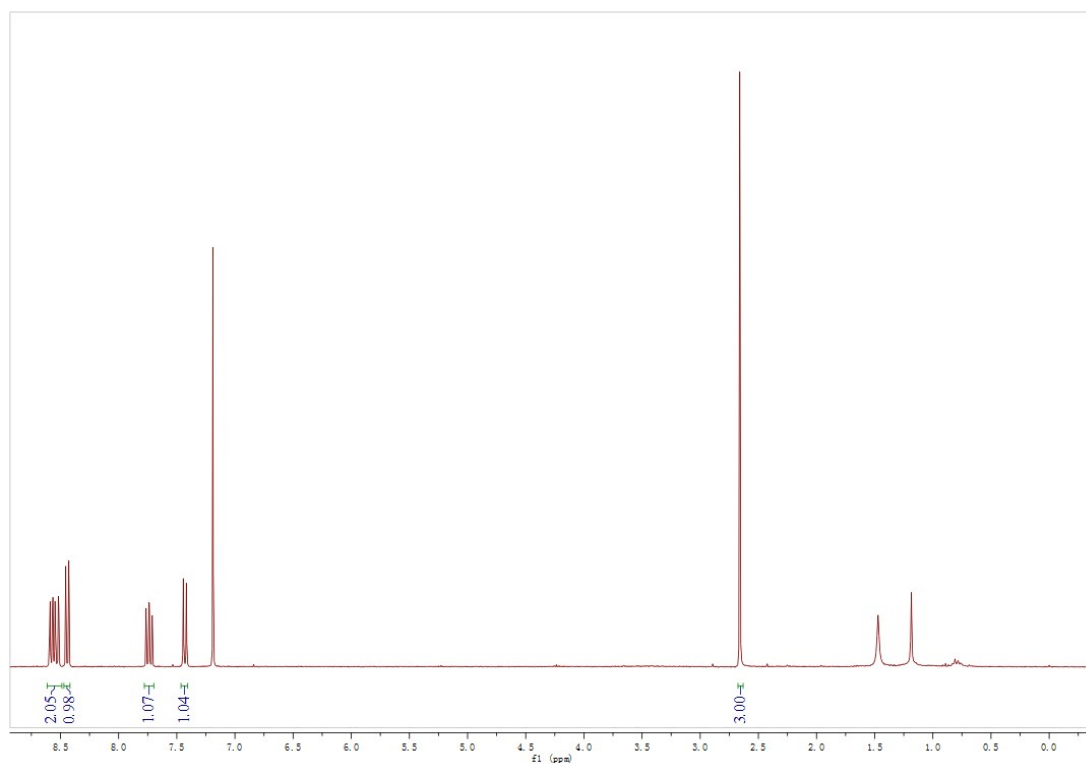

Fig. S1  $^1\text{H}$  NMR spectrum of compound 2 ( $\text{CDCl}_3$ )

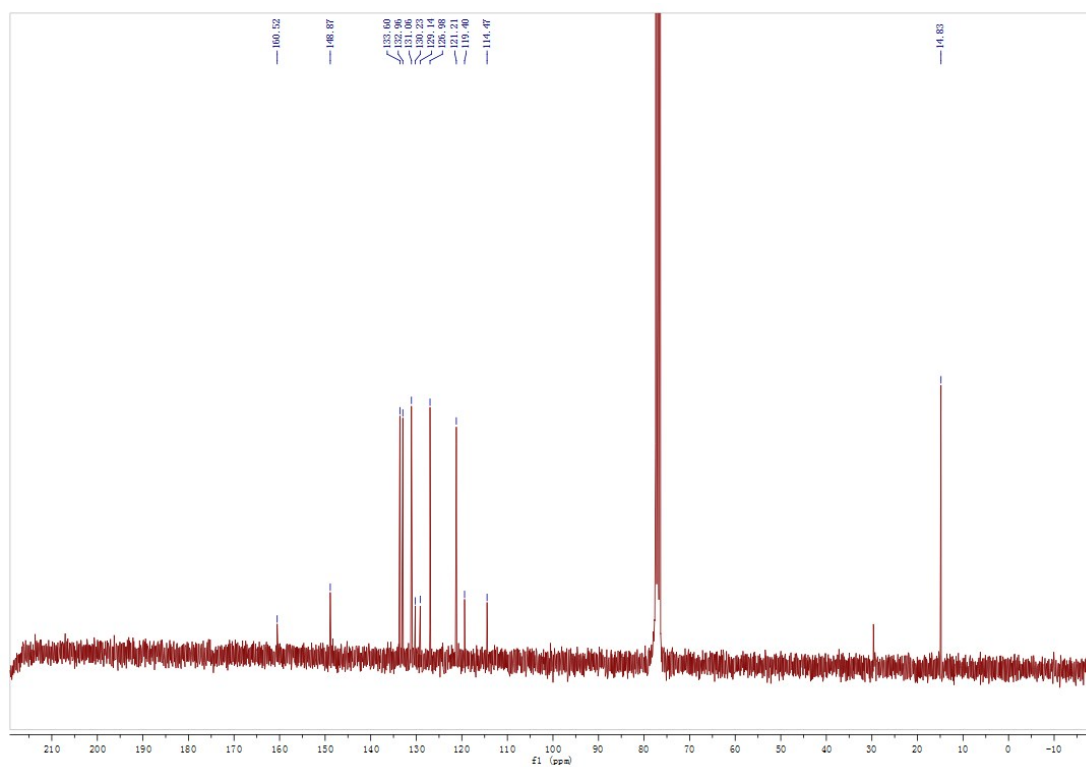

Fig. S2  $^{13}\text{C}$  NMR spectrum of compound 2 ( $\text{CDCl}_3$ )

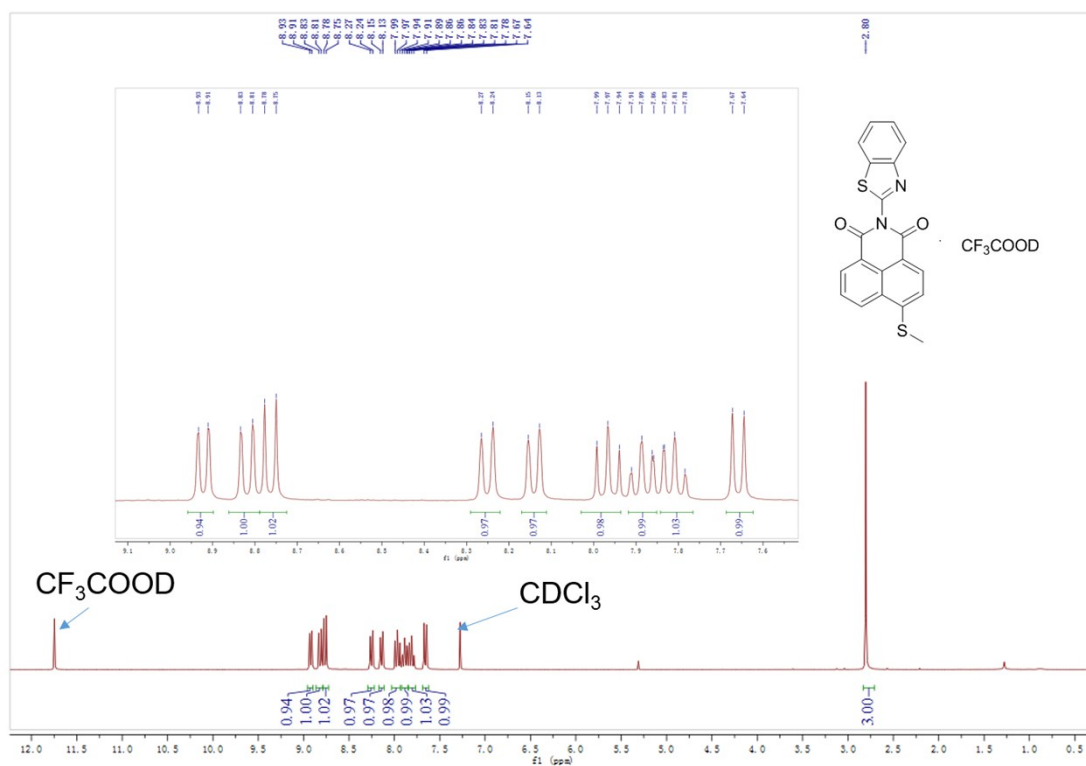

Fig. S3 <sup>1</sup>H NMR spectrum of Probe 1 (CDCl<sub>3</sub> + CF<sub>3</sub>COOD)

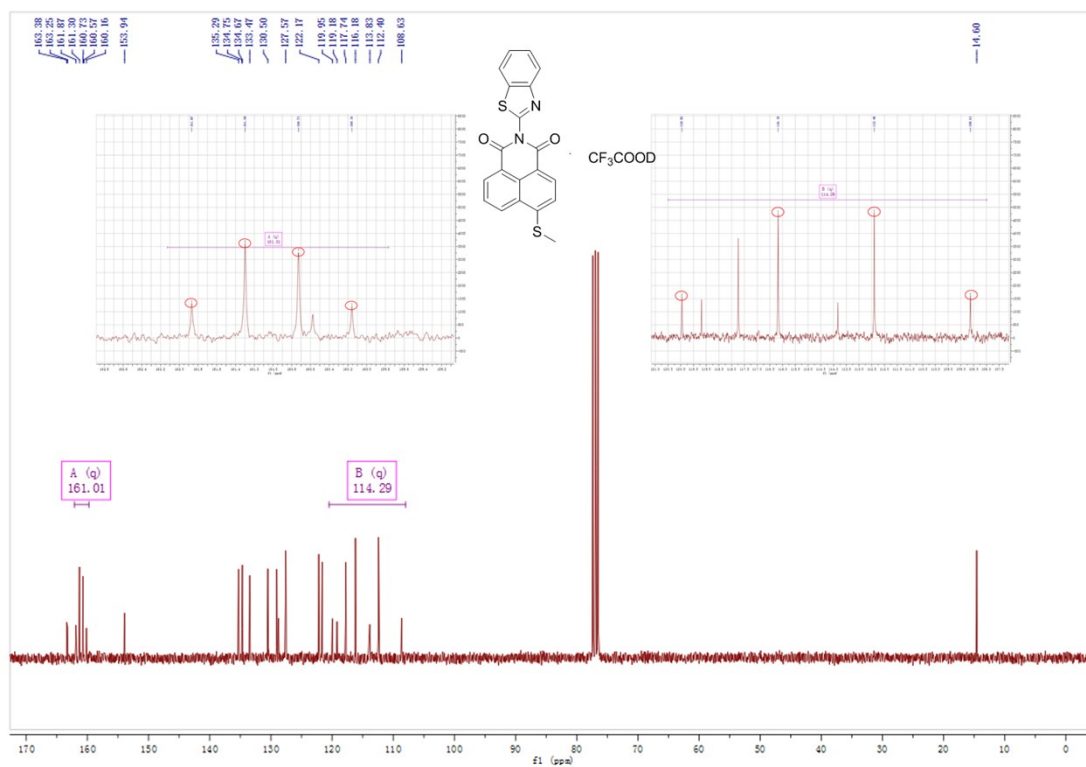

Fig. S4 <sup>13</sup>C NMR spectrum of Probe 1 (CDCl<sub>3</sub> + CF<sub>3</sub>COOD)

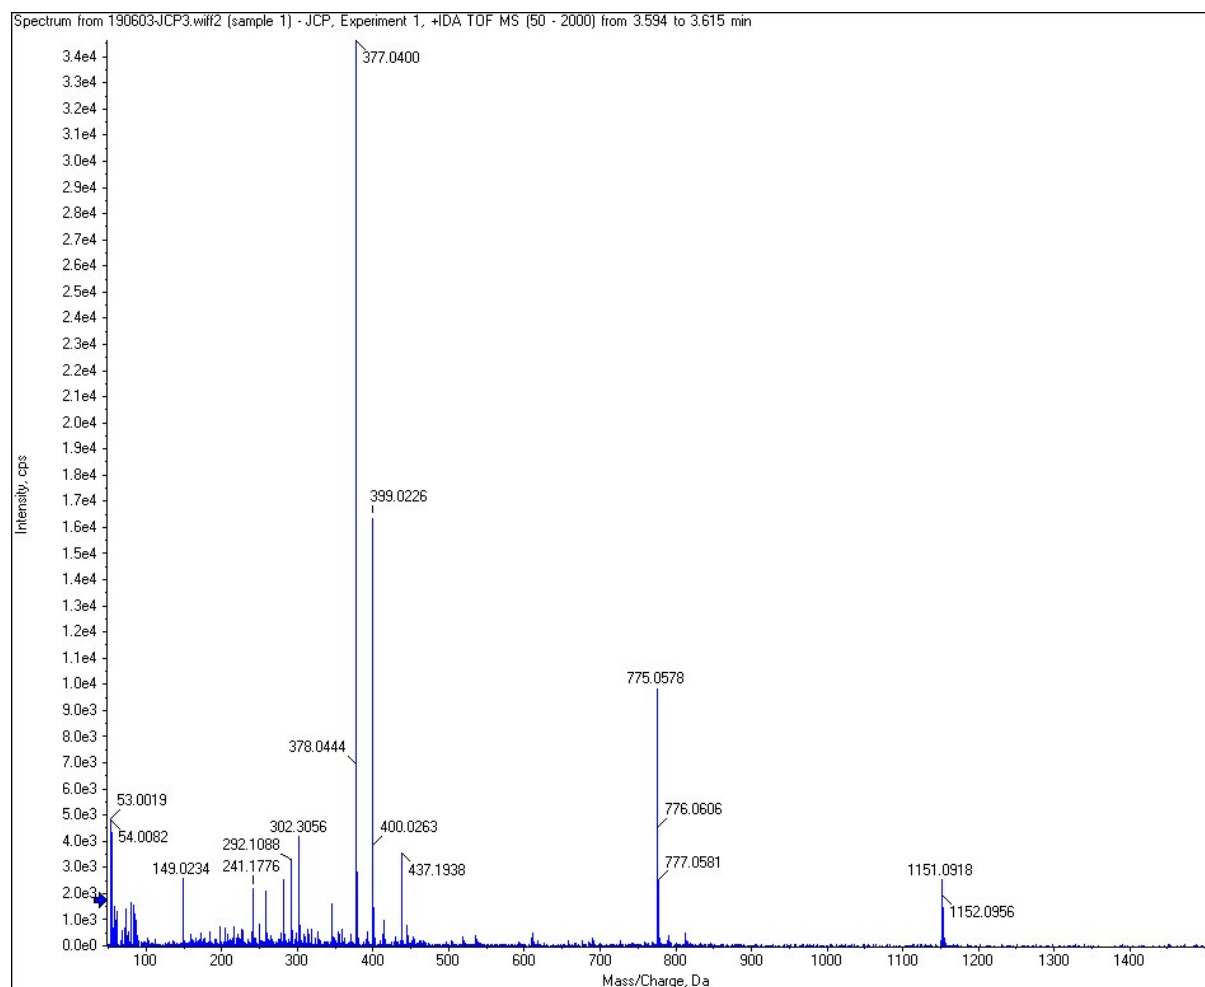

Fig. S5 HRMS spectra characterizations of Probe 1

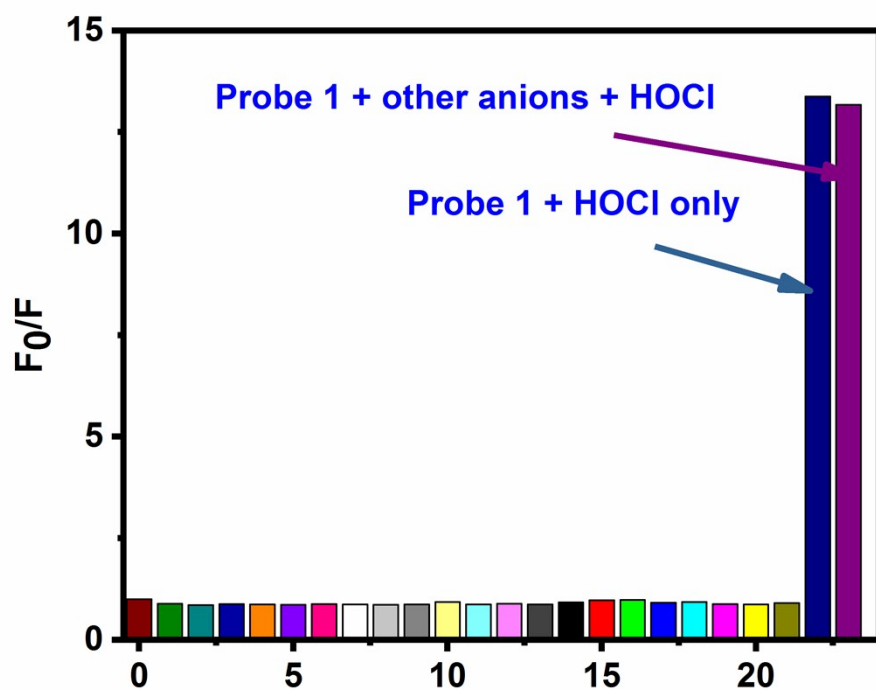

Fig. S6 Fluorescence spectra of Probe 1 to various relevant species (all 10eq;  $\text{NO}_3^-$ ,  $\text{NO}_2^-$ ,  $\text{Ag}^+$ ,  $\text{Al}^{3+}$ ,  $\text{Ca}^{2+}$ ,  $\text{Cr}^{3+}$ ,  $\text{Co}^{2+}$ ,  $\text{Fe}^{2+}$ ,  $\text{Fe}^{3+}$ ,  $\text{Mn}^{2+}$ ,  $\text{Ni}^{2+}$ ,  $\text{Pb}^{2+}$ ,  $\text{Zn}^{2+}$ ,  $\text{Cu}^{2+}$ ,  $\text{Hg}^{2+}$ ,  $\text{Cd}^{2+}$ ,  $\text{H}_2\text{O}_2$ , HOCl, NO, ONOO $^-$ ,  $\bullet\text{OH}$ , T-Buoo $^-$ ).

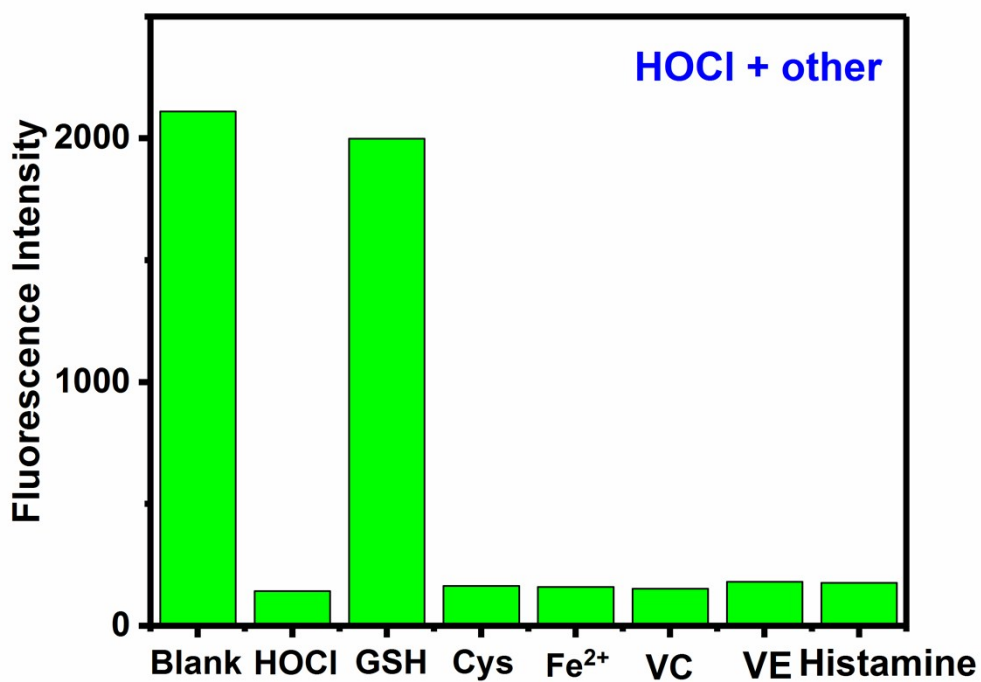

Fig. S7 Comparison of the fluorescence intensity with various reducing materials (10 eq) to **Probe 1** ( $10^{-5}\text{M}$ ) + HOCl.

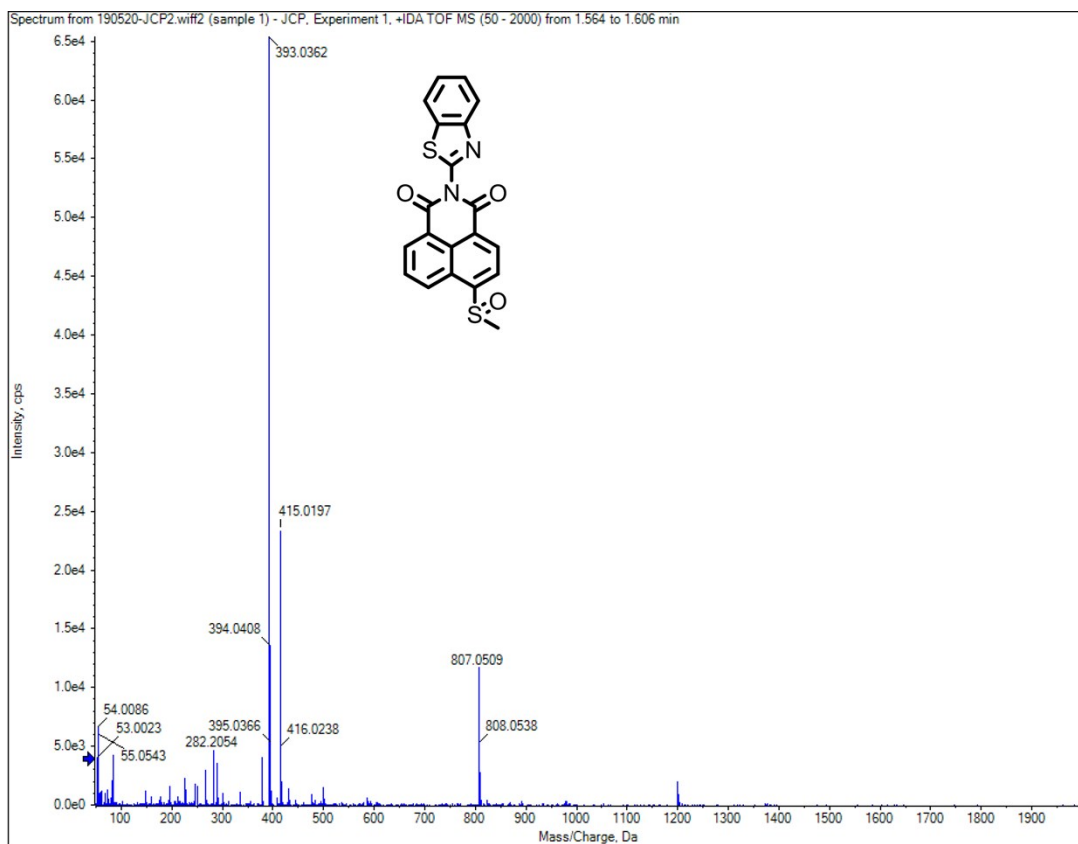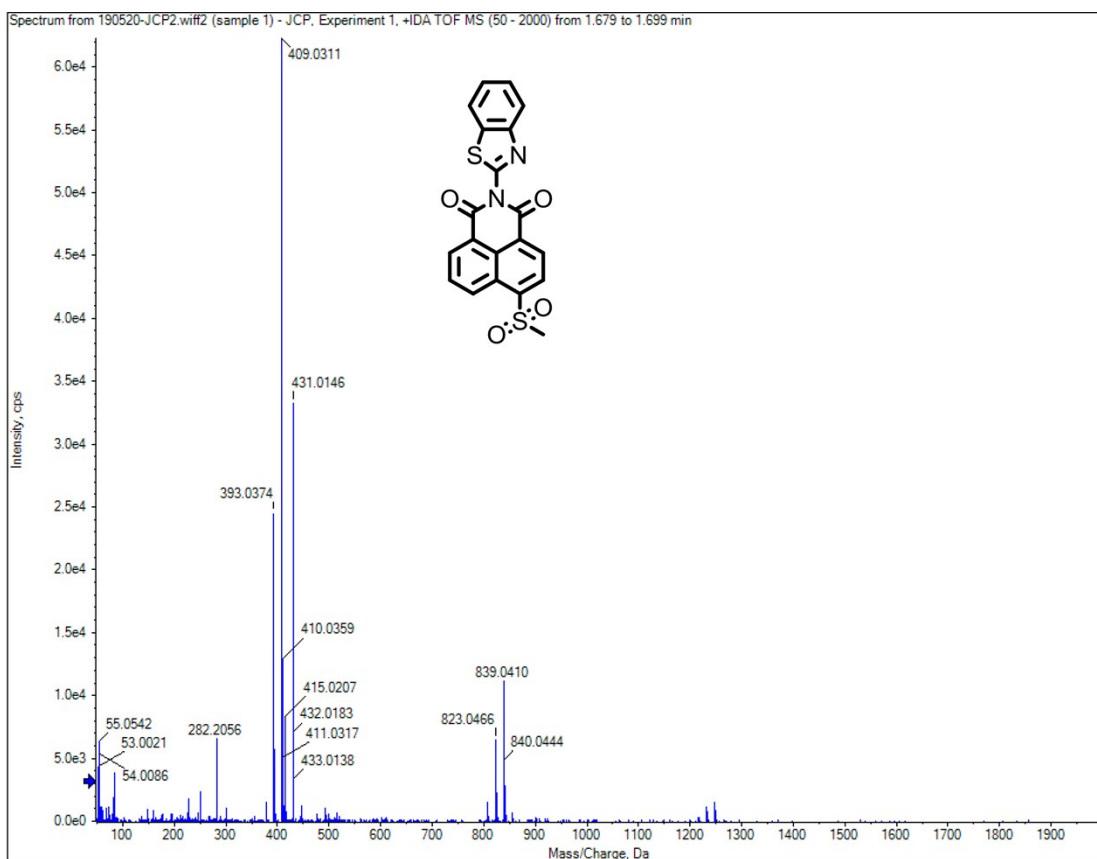

Fig. S8 Mass spectrum of Probe 1 after oxidation by HOCl

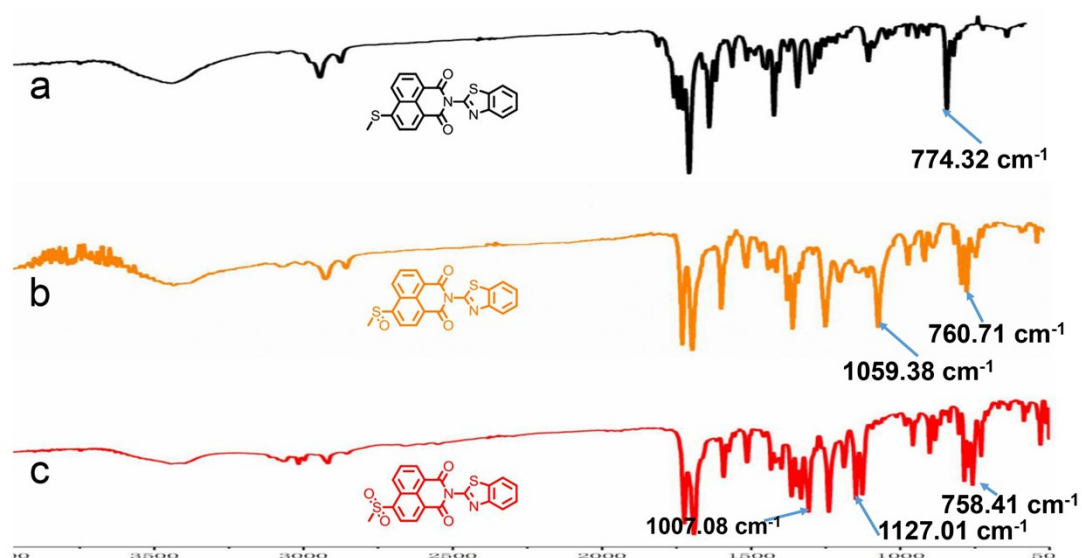

Fig. S9 FT-IR Spectra of Probe 1 and product after reaction with HOCl

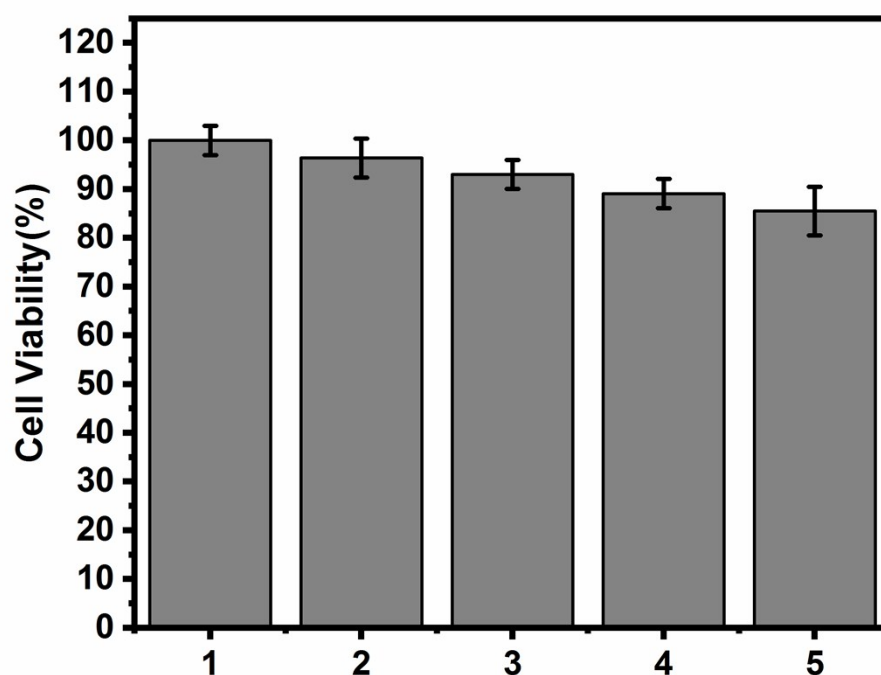

Fig. S10 MTT assay of HeLa cells treated in the presence of Probe 1 (1. 0μM 2. 5μM 3. 10μM 4. 20μM 5. 30μM) and incubated for 24 hours.

Table S1 Comparison of highly specific fluorescent probes for HOCl

| Probe | Detection limit | Reaction time | Stokes shift | Reference |
|-------|-----------------|---------------|--------------|-----------|
|-------|-----------------|---------------|--------------|-----------|

|                                                                                     |              |       |       |   |
|-------------------------------------------------------------------------------------|--------------|-------|-------|---|
| 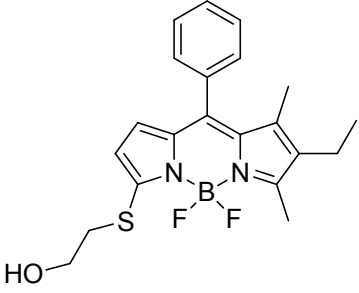   | 0.4 $\mu$ M  | fast  | 12nm  | 1 |
|    | 53nM         | 10min | 40nm  | 2 |
|   | 2.3nM        | 10min | 97 nm | 3 |
|  | 6.6nM        | 10min | 140nm | 4 |
|  | 0.72 $\mu$ M | null  | 150nm | 5 |
|  | 0.34 $\mu$ M | 60min | 170nm | 6 |



|                                                                                    |          |        |       |           |
|------------------------------------------------------------------------------------|----------|--------|-------|-----------|
| 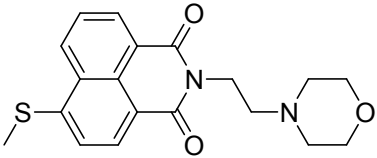  | 0.674 μM | 2.5min | 105nm | 7         |
|   | 0.72 μM  | 15min  | 14nm  | 8         |
|   | 0.453 μM | 20min  | 68nm  | 9         |
|   | 1.6 μM   | 30s    | 95nm  | 10        |
|  | 0.237 μM | 2min   | 120nm | This work |

## Reference

1. X. Wang, L. Zhou, F. Qiang, F. Wang, R. Wang and C. Zhao, *Analytica Chimica Acta*, 2016, **911**, 114-120.
2. Y. Jin, M. Lv, Y. Tao, S. Xu, J. He, J. Zhang and W. Zhao, *Spectrochimica Acta Part A: Molecular and Biomolecular Spectroscopy*, 2019, **219**, 569-575.
3. C. Liu, Q. Wang, X. Jiao, H. Yao, S. He, L. Zhao and X. Zeng, *Dyes and Pigments*, 2019, **160**, 989-994.
4. L. He, Y. Zhang, H. Xiong, J. Wang, Y. Geng, B. Wang, Y. Wang, Z. Yang and X. Song, *Dyes and Pigments*, 2019, **166**, 390-394.
5. B. Deng, M. Ren, X. Kong, K. Zhou and W. Lin, *Sensors and Actuators B: Chemical*, 2018, **255**, 963-969.
6. J. Sun, L. Zhang, Y. Hu and J. Fang, *Sensors and Actuators B: Chemical*, 2018, **266**, 447-454.
7. B. Zhang, Y. X, Z. R, L. Y, R. X, X. M, Y. Y and Z. Y, *Analytical Chemistry*, 2017, **89**, 10384-10390.
8. D. Soni, S. Gangada, N. Duvva, T. K. Roy, S. Nimesh, G. Arya, L. Giribabu and R. Chitta, *New Journal of Chemistry*, 2017, **41**, 5322-5333.
9. J. Weng, Q. Mei, B. Zhang, Y. Jiang, B. Tong, Q. Fan, Q. Ling and W. Huang, *Analyst*, 2013, **138**, 6607-6616.
10. Y. Zhang, Y. Zuo, T. Yang, Z. Gou, X. Wang and W. Lin, *Analyst*, 2019, **144**, 5075-5080.
